# Supplementary material for: Early life stress produces distinct, disease-relevant alterations in brain and behavior in males and females
Source: Research Square preprint supplement (doi:10.21203/rs.3.rs-7067384/v1), 2025-10-03
Supplement: Supplementary file 1 [file a56918ff9bf18de6475275f7.xlsx]

## Sheet: Sheet1
Table S1
Figure	Test Used	n	p value	F/t/r values
1A	Two-way ANOVA Post hoc: Šídák's multiple comparisons test	Male/Control = 18 Male/PND2S = 15 Female/Control = 17 Female/PND2S = 17	Sex × ELS: p=0.0444 Sex: p=0.9532 ELS: p=0.0208 Male/CTL vs Male/PND2S: p=0.0058	F (1, 63) = 4.207 F (1, 63) = 0.003478 F (1, 63) = 5.619
1B	Two-way ANOVA Post hoc: Šídák's multiple comparisons test	Male/Control = 18 Male/PND2S = 15 Female/Control = 17 Female/PND2S = 17	Sex × ELS: p=0.0065 Sex: p=0.1027 ELS: p=0.2847 Male/PND2S vs. Female/PND2S: p=0.0059 Male/CTL vs Male/PND2S: p=0.0164	F (1, 63) = 7.927 F (1, 63) = 2.742 F (1, 63) = 1.164
1C	Two-way ANOVA Post hoc: Šídák's multiple comparisons test	Male/Control = 18 Male/PND2S = 15 Female/Control = 17 Female/PND2S = 17	Sex × ELS: p=0.0062 Sex: p<0.0001 ELS: p=0.0033 Male/PND2S vs. Female/PND2S: p<0.0001 Male/CTL vs Male/PND2S: p=0.0002	F (1, 63) = 8.020 F (1, 63) = 18.91 F (1, 63) = 9.302
1D	Two-way ANOVA Post hoc: Šídák's multiple comparisons test	Male/Control = 18 Male/PND2S = 15 Female/Control = 17 Female/PND2S = 17	Sex × ELS: p=0.0133 Sex: p=0.3311 ELS: p=0.0557 Male/PND2S vs. Female/PND2S: p=0.0349 Female/CTL vs Female/PND2S: p=0.0042	F (1, 63) = 6.486 F (1, 63) = 0.9592 F (1, 63) = 3.802
1E	Two-way ANOVA Post hoc: Šídák's multiple comparisons test	Male/Control = 18 Male/PND2S = 15 Female/Control = 17 Female/PND2S = 17	Sex × ELS: p=0.1306 Sex: p=0.0012 ELS: p=0.0405 Male/PND2S vs. Female/PND2S: p=0.0023 Female/CTL vs Female/PND2S: p=0.0239	F (1, 63) = 2.346 F (1, 63) = 11.52 F (1, 63) = 4.374
1F	Two-way ANOVA Post hoc: Šídák's multiple comparisons test	Male/Control = 18 Male/PND2S = 15 Female/Control = 17 Female/PND2S = 17	Sex × ELS: p=0.5625 Sex: p=0.3721 ELS: p=0.7902	F (1, 63) = 0.3390 F (1, 63) = 0.8082 F (1, 63) = 0.07139
1G	Two-way ANOVA Post hoc: Šídák's multiple comparisons test	Male/Control = 14 Male/PND2S = 16 Female/Control = 14 Female/PND2S = 15	Sex × ELS: p=0.0275 Sex: p=0.1388 ELS: p=0.1977 Male/PND2S vs. Female/PND2S: p=0.0168 Male/CTL vs Male/PND2S: p=0.0275	F (1, 55) = 5.128 F (1, 55) = 2.256 F (1, 55) = 1.700
1H	Two-way ANOVA Post hoc: Šídák's multiple comparisons test	Male/Control = 14 Male/PND2S = 16 Female/Control = 14 Female/PND2S = 15	Sex × ELS: p=0.0014 Sex: p=0.2987 ELS: p=0.0955 Male/PND2S vs. Female/PND2S: p=0.0046 Male/CTL vs Male/PND2S: p=0.0013	F (1, 55) = 11.30 F (1, 55) = 1.101 F (1, 55) = 2.878
1I	Two-way ANOVA Post hoc: Šídák's multiple comparisons test	Male/Control = 14 Male/PND2S = 16 Female/Control = 14 Female/PND2S = 15	Sex × ELS: p=0.0001 Sex: p=0.0799 ELS: p=0.0350 Male/PND2S vs. Female/PND2S: p=0.0002 Male/CTL vs Male/PND2S: p<0.0001	F (1, 55) = 16.64 F (1, 55) = 3.184 F (1, 55) = 4.675
2C	Two-way ANOVA	Male/Control = 6 Male/PND2S = 6 Female/Control = 5 Female/PND2S = 6	Sex × ELS: p=0.7769 Sex: p=0.5641 ELS: p=0.4451	F (1, 19) = 0.08262 F (1, 19) = 0.3445 F (1, 19) = 0.6081
2D	Two-way ANOVA	Male/Control = 6 Male/PND2S = 6 Female/Control = 5 Female/PND2S = 6	Sex × ELS: p=0.4089 Sex: p=0.6252 ELS: p=0.6446	F (1, 19) = 0.7132 F (1, 19) = 0.2465 F (1, 19) = 0.2198
2E	Three-way ANOVA Post hoc: Šídák's multiple comparisons test	Male/Control/Naive = 3 Male/Control/Social = 3 Male/PND2S/Naïve = 3 Male/PND2S/Social = 3 Female/Control/Naïve = 3 Female/Control/Social = 2 Female/PND2S/Naïve = 3 Female/PND2S/Social = 3	Social: p<0.0001 ELS: p=0.0314 Social x Sex x ELS: p=0.0191 Male/PND2S/Naïve vs. Male/PND2S/Social: p=0.0002 Female/Control/Naïve vs. Female/Control/Social: p=0.0014 Female/PND2S/Naïve vs. Female/PND2S/Social: p=0.0123 Male/Control/Social vs. Male/PND2S/Social: p=0.0199	F (1, 15) = 79.27 F (1, 15) = 5.638 F (1, 15) = 6.897
2F	Three-way ANOVA Post hoc: Šídák's multiple comparisons test	Male/Control/Naive = 3 Male/Control/Social = 3 Male/PND2S/Naïve = 3 Male/PND2S/Social = 3 Female/Control/Naïve = 3 Female/Control/Social = 2 Female/PND2S/Naïve = 3 Female/PND2S/Social = 3	Social: p<0.0001 ELS: p=0.1992 Sex x ELS: p=0.1469 Male/Control/Naïve vs. Male/Control/Social: p=0.0005 Male/PND2S/Naïve vs. Male/PND2S/Social: p=0.0001 Female/Control/Naïve vs. Female/Control/Social: p=0.0029 Female/PND2S/Naïve vs. Female/PND2S/Social: p=0.0019	F (1, 15) = 120.5 F (1, 15) = 1.804 F (1, 15) = 2.340
2G	Pearson r	Male/Control/Naive = 3 Male/Control/Social = 3 Male/PND2S/Naïve = 3 Male/PND2S/Social = 3 Female/Control/Naïve = 3 Female/Control/Social = 2 Female/PND2S/Naïve = 3 Female/PND2S/Social = 3	p<0.0001	r=0.8562
2H	Three-way ANOVA Post hoc: Šídák's multiple comparisons test	Male/Control/Naive = 3 Male/Control/Social = 3 Male/PND2S/Naïve = 3 Male/PND2S/Social = 3 Female/Control/Naïve = 3 Female/Control/Social = 3 Female/PND2S/Naïve = 3 Female/PND2S/Social = 3	Social: p<0.0001 ELS: p=0.0927 Sex x ELS: p=0.0466 Social x Sex x ELS: p=0.0732 Male/Control/Naïve vs. Male/Control/Social: p=0.0001 Male/PND2S/Naïve vs. Male/PND2S/Social: p=0.0301 Female/Control/Naïve vs. Female/Control/Social: p=0.0089 Female/PND2S/Naïve vs. Female/PND2S/Social: p=0.0009 Male/Control/Social vs. Male/PND2S/Social: p=0.0495	F (1, 16) = 93.06 F (1, 16) = 3.197 F (1, 16) = 4.653 F (1, 16) = 3.678
2I	Three-way ANOVA Post hoc: Šídák's multiple comparisons test	Male/Control/Naive = 3 Male/Control/Social = 3 Male/PND2S/Naïve = 3 Male/PND2S/Social = 3 Female/Control/Naïve = 3 Female/Control/Social = 3 Female/PND2S/Naïve = 3 Female/PND2S/Social = 3	Social: p<0.0001 Sex: p=0.0462 Sex x ELS: p=0.0046 Social x Sex x ELS: p=0.0071 Male/Control/Naïve vs. Male/Control/Social: p<0.0001 Male/PND2S/Naïve vs. Male/PND2S/Social: p=0.0265 Female/Control/Naïve vs. Female/Control/Social: p=0.0027 Female/PND2S/Naïve vs. Female/PND2S/Social: p=0.0001 Male/Control/Social vs. Male/PND2S/Social: p=0.0041 Male/PND2S/Social vs. Female/PND2S/Social: p=0.0102	F (1, 16) = 131.0 F (1, 16) = 4.672 F (1, 16) = 10.85 F (1, 16) = 9.518
2J	Pearson r	Male/Control/Naive = 3 Male/Control/Social = 3 Male/PND2S/Naïve = 3 Male/PND2S/Social = 3 Female/Control/Naïve = 3 Female/Control/Social = 3 Female/PND2S/Naïve = 3 Female/PND2S/Social = 3	p<0.0001	r=0.8817
3B	Two-way RM ANOVA Post hoc: Šídák's multiple comparisons test	Male/PND2S/mCherry/SAL = 14 Male/PND2S/mCherry/CNO = 14 Male/PND2S/Gi/SAL = 16 Male/PND2S/Gi/CNO = 16 Male/PND2S/Gq/SAL = 14 Male/PND2S/Gq/CNO = 14	DREADD x CNO: p=0.0255 DREADD: p=0.3769 CNO: p=0.0147 Male/PND2S/mCherry/SAL vs. Male/PND2S/mCherry/CNO: p>0.9999 Male/PND2S/Gi/SAL vs. Male/PND2S/Gi/CNO: p=0.0012 Male/PND2S/Gq/SAL vs. Male/PND2S/Gq/CNO: p=0.8451	F (2, 41) = 4.018 F (2, 41) = 0.9993 F (1, 41) = 6.488
3C	Two-way RM ANOVA Post hoc: Šídák's multiple comparisons test	Male/PND2S/mCherry/SAL = 14 Male/PND2S/mCherry/CNO = 14 Male/PND2S/Gi/SAL = 16 Male/PND2S/Gi/CNO = 16 Male/PND2S/Gq/SAL = 14 Male/PND2S/Gq/CNO = 14	DREADD x CNO: p=0.4785 DREADD: p=0.6503 CNO: p=0.4827 Male/PND2S/mCherry/SAL vs. Male/PND2S/mCherry/CNO: p=0.9609 Male/PND2S/Gi/SAL vs. Male/PND2S/Gi/CNO: p=0.4768 Male/PND2S/Gq/SAL vs. Male/PND2S/Gq/CNO: p=0.9687	F (2, 41) = 0.7506 F (2, 41) = 0.4349 F (1, 41) = 0.5018
3D	Two-way RM ANOVA Post hoc: Šídák's multiple comparisons test	Male/PND2S/mCherry/SAL = 14 Male/PND2S/mCherry/CNO = 14 Male/PND2S/Gi/SAL = 16 Male/PND2S/Gi/CNO = 16 Male/PND2S/Gq/SAL = 14 Male/PND2S/Gq/CNO = 14	DREADD x CNO: p=0.0013 DREADD: p=0.2661 CNO: p=0.0002 Male/PND2S/mCherry/SAL vs. Male/PND2S/mCherry/CNO: p=0.8716 Male/PND2S/Gi/SAL vs. Male/PND2S/Gi/CNO: p<0.0001 Male/PND2S/Gq/SAL vs. Male/PND2S/Gq/CNO: p=0.7785	F (2, 41) = 7.844 F (2, 41) = 1.368 F (1, 41) = 16.86
3E	Two-way RM ANOVA Post hoc: Šídák's multiple comparisons test	Male/PND2S/mCherry/SAL = 14 Male/PND2S/mCherry/CNO = 14 Male/PND2S/Gi/SAL = 16 Male/PND2S/Gi/CNO = 16 Male/PND2S/Gq/SAL = 14 Male/PND2S/Gq/CNO = 14	DREADD x CNO: p=0.0006 DREADD: p=0.2368 CNO: p=0.7232 Male/PND2S/mCherry/SAL vs. Male/PND2S/mCherry/CNO: p=0.8770 Male/PND2S/Gi/SAL vs. Male/PND2S/Gi/CNO: p=0.0104 Male/PND2S/Gq/SAL vs. Male/PND2S/Gq/CNO: p=0.0214	F (2, 41) = 9.041 F (2, 41) = 1.492 F (1, 41) = 0.1272
3F	Two-way RM ANOVA Post hoc: Šídák's multiple comparisons test	Female/PND2S/mCherry/SAL = 10 Female/PND2S/mCherry/CNO = 10 Female/PND2S/Gi/SAL = 9 Female/PND2S/Gi/CNO = 9 Female/PND2S/Gq/SAL = 9 Female/PND2S/Gq/CNO = 9	DREADD x CNO: p=0.0257 DREADD: p=0.0869 CNO: p=0.2347 Female/PND2S/mCherry/SAL vs. Female/PND2S/mCherry/CNO: p=0.8409 Female/PND2S/Gi/SAL vs. Female/PND2S/Gi/CNO: p=0.9936 Female/PND2S/Gq/SAL vs. Female/PND2S/Gq/CNO: p=0.0169	F (2, 25) = 4.254 F (2, 25) = 2.698 F (1, 25) = 1.483
4B	Two-way RM ANOVA Post hoc: Šídák's multiple comparisons test	Male/PND2S/mCherry/SAL = 10 Male/PND2S/mCherry/CNO = 10 Male/PND2S/Gq/SAL = 11 Male/PND2S/Gq/CNO = 11	DREADD x CNO: p=0.8789 DREADD: p=0.2268 CNO: p=0.5451 Male/PND2S/mCherry/SAL vs. Male/PND2S/mCherry/CNO: p=0.7868 Male/PND2S/Gq/SAL vs. Male/PND2S/Gq/CNO: p=0.6283	F (1, 19) = 0.02385 F (1, 19) = 1.560 F (1, 19) = 0.3797
4C	Two-way RM ANOVA Post hoc: Šídák's multiple comparisons test	Male/PND2S/mCherry/SAL = 10 Male/PND2S/mCherry/CNO = 10 Male/PND2S/Gq/SAL = 11 Male/PND2S/Gq/CNO = 11	DREADD x CNO: p=0.1508 DREADD: p=0.1430 CNO: p=0.0068 Male/PND2S/mCherry/SAL vs. Male/PND2S/mCherry/CNO: p=0.5113 Male/PND2S/Gq/SAL vs. Male/PND2S/Gq/CNO: p=0.0078	F (1, 19) = 2.241 F (1, 19) = 2.335 F (1, 19) = 9.219
5A	Two-way ANOVA Post hoc: Šídák's multiple comparisons test	XYM/CTL = 9 XYM/PND2S = 11 XYF/CTL = 7 XYF/PND2S = 12	ELS x Gonadal sex: p=0.5956 Gonadal sex: p=0.9591 ELS: p=0.0003 XYM/CTL vs. XYM/PND2S: p=0.0043 XYF/CTL vs. XYF/PND2S: p=0.0435	F (1, 35) = 0.2869 F (1, 35) = 0.002664 F (1, 35) = 16.16
5B	Two-way ANOVA Post hoc: Šídák's multiple comparisons test	XXM/CTL = 10 XXM/PND2S = 13 XXF/CTL = 15 XXF/PND2S = 13	ELS x Gonadal sex: p=0.2723 Gonadal sex: p=0.3359 ELS: p=0.9836	F (1, 47) = 1.234 F (1, 47) = 0.9452 F (1, 47) = 0.0004289
5C	Two-way ANOVA Post hoc: Šídák's multiple comparisons test	XY/CTL (M+F) = 16 XY/PND2S (M+F) = 23 XX/CTL (M+F) = 23 XX/PND2S (M+F) = 28	ELS x Chromosomal sex: p=0.0068 Chromosomal sex: p=0.1632 ELS: p=0.0037 XY/CTL (M+F) vs. XY/PND2S (M+F): p=0.0005 XY/PND2S (M+F) vs. XX/PND2S (M+F): p=0.0039	F (1, 86) = 7.682 F (1, 86) = 1.978 F (1, 86) = 8.898
5D	Two-way ANOVA Post hoc: Šídák's multiple comparisons test	XYM/CTL = 9 XYM/PND2S = 11 XYF/CTL = 7 XYF/PND2S = 12	ELS x Gonadal sex: p=0.8621 Gonadal sex: p=0.9789 ELS: p=0.0017 XYM/CTL vs. XYM/PND2S: p=0.0494 XYF/CTL vs. XYF/PND2S: p=0.0382	F (1, 35) = 0.03063 F (1, 35) = 0.0007091 F (1, 35) = 11.50
5E	Two-way ANOVA Post hoc: Šídák's multiple comparisons test	XXM/CTL = 10 XXM/PND2S = 13 XXF/CTL = 15 XXF/PND2S = 13	ELS x Gonadal sex: p=0.0843 Gonadal sex: p=0.5864 ELS: p=0.7160	F (1, 47) = 3.110 F (1, 47) = 0.3001 F (1, 47) = 0.1340
5F	Two-way ANOVA Post hoc: Šídák's multiple comparisons test	XY/CTL (M+F) = 16 XY/PND2S (M+F) = 23 XX/CTL (M+F) = 23 XX/PND2S (M+F) = 28	ELS x Chromosomal sex: p=0.0036 Chromosomal sex: p=0.0013 ELS: p=0.0089 XY/CTL (M+F) vs. XY/PND2S (M+F): p=0.0006 XY/PND2S (M+F) vs. XX/PND2S (M+F): p<0.0001	F (1, 86) = 8.972 F (1, 86) = 10.98 F (1, 86) = 7.176
5G	Two-way ANOVA Post hoc: Šídák's multiple comparisons test	XYM/CTL = 9 XYM/PND2S = 10 XYF/CTL = 7 XYF/PND2S = 12	ELS x Gonadal sex: p=0.1266 Gonadal sex: p=0.0057 ELS: p=0.0117 XYF/CTL vs. XYF/PND2S: p=0.0117 XYM/PND2S vs. XYF/PND2S: p=0.0027	F (1, 34) = 2.452 F (1, 34) = 8.704 F (1, 34) = 7.094
5H	Two-way ANOVA Post hoc: Šídák's multiple comparisons test	XXM/CTL = 10 XXM/PND2S = 13 XXF/CTL = 13 XXF/PND2S = 13	ELS x Gonadal sex: p=0.0773 Gonadal sex: p=0.0402 ELS: p=0.3815 XXF/CTL vs. XXF/PND2S: p=0.1062 XXM/PND2S vs. XXF/PND2S: p=0.0123	F (1, 45) = 3.268 F (1, 45) = 4.462 F (1, 45) = 0.7811
5I	Two-way ANOVA Post hoc: Šídák's multiple comparisons test	Male/CTL (XY+XX) = 19 Male/PND2S (XY +XX) = 23 Female/CTL (XY+XX) = 20 Female/PND2S (XY+XX) = 25	ELS x Gonadal sex: p=0.0168 Gonadal sex: p=0.0004 ELS: p=0.0131 Female/CTL (XY+XX) vs. Female/PND2S (XY+XX): p=0.0012 Male/PND2S (XY+XX) vs. Female/PND2S (XY+XX): p<0.0001	F (1, 83) = 5.954 F (1, 83) = 13.47 F (1, 83) = 6.430
S1B	Two-way RM ANOVA Post hoc: Dunnett's multiple comparisons test	Male/CTL = 6 Male/PND2S = 9 Male/PND10S = 15	Age x ELS: p=0.7644 Age: p<0.0001 ELS: p=0.1973	F (4, 54) = 0.4604 F (2, 54) = 2204 F (2, 27) = 1.724
S1C	Two-way RM ANOVA Post hoc: Dunnett's multiple comparisons test	Female/CTL = 11 Female/PND2S = 10 Female/PND10S = 7	Age x ELS: p=0.2226 Age: p<0.0001 ELS: p=0.0157 Female/CTL/PND63 vs. Female/PND10S/PND63: p=0.0051	F (4, 50) = 1.479 F (2, 50) = 1729 F (2, 25) = 4.928
S1D	Welch's ANOVA	Male/CTL = 6 Male/PND2S = 9 Male/PND10S = 15	p=0.7328	W (2.000, 9.423) = 0.3214
S1E	Welch's ANOVA Post hoc: Dunnett's T3 multiple comparisons test	Male/CTL = 6 Male/PND2S = 9 Male/PND10S = 15	p=0.0216 CTL vs. PND2S: p=0.8652 CTL vs. PND10S: p=0.0495	W (2.000, 9.240) = 5.976
S1F	One-way ANOVA	Female/CTL = 9 Female/PND2S = 15 Female/PND10S = 7	p=0.8772	F (2, 28) = 0.1317
S1G	One-way ANOVA	Female/CTL = 9 Female/PND2S = 15 Female/PND10S = 6	p=0.9719	F (2, 27) = 0.02853
S1H	One-way ANOVA	Male/CTL = 6 Male/PND2S = 9 Male/PND10S = 15	p=0.4522	F (2, 27) = 0.8175
S1I	One-way ANOVA	Male/CTL = 6 Male/PND2S = 9 Male/PND10S = 15	p=0.5045	F (2, 27) = 0.7017
S1J	One-way ANOVA	Female/CTL = 9 Female/PND2S = 15 Female/PND10S = 7	p=0.6934	F (2, 28) = 0.3710
S1K	One-way ANOVA	Female/CTL = 9 Female/PND2S = 15 Female/PND10S = 7	p=0.4634	F (2, 28) = 0.7907
S1L	Welch's ANOVA Post hoc: Dunnett's T3 multiple comparisons test	Male/CTL = 25 Male/PND2S = 25 Male/PND10S = 22	p=0.0319 CTL vs. PND2S: p=0.0263 CTL vs. PND10S: p=0.2395	W (2.000, 42.26) = 3.741
S1M	One-way ANOVA	Female/CTL = 11 Female/PND2S = 18 Female/PND10S = 15	p=0.8199	F (2, 41) = 0.1995
S1N	Two-way RM ANOVA Post hoc: Dunnett's multiple comparisons test	Male/CTL = 25 Male/PND2S = 25 Male/PND10S = 22	Trial × ELS: p=0.1852 Trial: p<0.0001 ELS: p=0.4072 CTL (Trial 3) vs. PND2S (Trial 3): p=0.0444	F (4, 138) = 1.572 F (2, 138) = 42.32 F (2, 69) = 0.9102
S1O	Two-way RM ANOVA	Female/CTL = 11 Female/PND2S = 18 Female/PND10S = 15	Trial × ELS: p=0.7545 Trial: p<0.0001 ELS: p=0.5113	F (4, 82) = 0.4743 F (2, 82) = 12.79 F (2, 41) = 0.6819
S1P	Two-way RM ANOVA Post hoc: Dunnett's multiple comparisons test	Male/CTL = 17 Male/PND2S = 17 Male/PND10S = 8	Sound intensity × ELS: p=0.2788 Sound intensity: p<0.0001 ELS: p=0.1412 CTL (19dB) vs. PND2S (19dB): p=0.0401	F (4, 78) = 1.296 F (2, 78) = 31.87 F (2, 39) = 2.059
S1Q	Two-way RM ANOVA	Female/CTL = 8 Female/PND2S = 10 Female/PND10S = 8	Sound intensity × ELS: p=0.3753 Sound intensity: p<0.0001 ELS: p=0.8600	F (4, 46) = 1.084 F (2, 46) = 17.65 F (2, 23) = 0.1518
S1R	One-way ANOVA	Male/CTL = 11 Male/PND2S = 12 Male/PND10S = 10	p=0.8417	F (2, 30) = 0.1733
S1S	Welch's ANOVA	Female/CTL = 10 Female/PND2S = 12 Female/PND10S = 9	p=0.0877	W (2.000, 17.45) = 2.807
S1T	Two-way RM ANOVA	Male/CTL = 11 Male/PND2S = 12 Male/PND10S = 10	Trial × ELS: p=0.4696 Trial: p<0.0001 ELS: p=0.1222	F (4, 60) = 0.9003 F (2, 60) = 12.21 F (2, 30) = 2.257
S1U	Two-way RM ANOVA	Female/CTL = 10 Female/PND2S = 12 Female/PND10S = 9	Trial × ELS: p=0.5493 Trial: p<0.0001 ELS: p=0.5834	F (4, 56) = 0.7700 F (2, 56) = 19.91 F (2, 28) = 0.5494
S1V	Two-way RM ANOVA	Male/CTL = 11 Male/PND2S = 12 Male/PND10S = 10	Sound intensity × ELS: p=0.1153 Sound intensity: p<0.0001 ELS: p=0.8404	F (4, 60) = 1.941 F (1.732, 51.95) = 33.05 F (2, 30) = 0.1749
S1W	Two-way RM ANOVA Post hoc: Dunnett's multiple comparisons test	Female/CTL = 7 Female/PND2S = 12 Female/PND10S = 9	Sound intensity × ELS: p=0.9636 Sound intensity: p<0.0001 ELS: p=0.0097 CTL (9dB) vs. PND2S (9dB): p=0.0809 CTL (14dB) vs. PND2S (14dB): p=0.0527	F (4, 50) = 0.1467 F (2, 50) = 33.63 F (2, 25) = 5.619
S2A	Two-way ANOVA	Male/Control = 18 Male/PND2S = 14 Female/Control = 17 Female/PND2S = 17	Sex × ELS: p=0.1328 Sex: p=0.6856 ELS: p=0.5675	F (1, 62) = 2.319 F (1, 62) = 0.1655 F (1, 62) = 0.3305
S2B	Two-way ANOVA Post hoc: Šídák's multiple comparisons test	Male/Control = 18 Male/PND2S = 14 Female/Control = 17 Female/PND2S = 17	Sex × ELS: p=0.0115 Sex: p=0.9534 ELS: p=0.0079 Male/CTL vs. Male/PND2S: p=0.0009	F (1, 62) = 6.778 F (1, 62) = 0.003445 F (1, 62) = 7.549
S2C	Two-way ANOVA Post hoc: Šídák's multiple comparisons test	Male/Control = 18 Male/PND2S = 14 Female/Control = 17 Female/PND2S = 17	Sex × ELS: p=0.0038 Sex: p=0.1110 ELS: p<0.0001 Male/CTL vs. Male/PND2S: p<0.0001 Male/PND2S vs. Female/PND2S: p=0.0047	F (1, 62) = 9.053 F (1, 62) = 2.614 F (1, 62) = 18.10
S2D	Two-way ANOVA	Male/Control = 18 Male/PND2S = 14 Female/Control = 17 Female/PND2S = 17	Sex × ELS: p=0.7407 Sex: p=0.5369 ELS: p=0.6113	F (1, 62) = 0.1105 F (1, 62) = 0.3855 F (1, 62) = 0.2609
S2E	Two-way ANOVA	Male/Control = 18 Male/PND2S = 14 Female/Control = 17 Female/PND2S = 17	Sex × ELS: p=0.9838 Sex: p=0.2447 ELS: p=0.3151	F (1, 62) = 0.0004179 F (1, 62) = 1.379 F (1, 62) = 1.026
S2F	Two-way ANOVA Post hoc: Šídák's multiple comparisons test	Male/Control = 18 Male/PND2S = 14 Female/Control = 17 Female/PND2S = 17	Sex × ELS: p=0.0433 Sex: p=0.5107 ELS: p=0.7443 Male/CTL vs. Male/PND2S: p=0.1939 Male/PND2S vs. Female/PND2S: p=0.1288	F (1, 62) = 4.256 F (1, 62) = 0.4377 F (1, 62) = 0.1074
S2G	Two-way ANOVA	Male/Control = 9 Male/PND2S = 9 Female/Control = 9 Female/PND2S = 9	Sex × ELS: p=0.8842 Sex: p=0.9352 ELS: p=0.1057	F (1, 32) = 0.02154 F (1, 32) = 0.006717 F (1, 32) = 2.772
S2H	Two-way ANOVA	Male/Control = 9 Male/PND2S = 9 Female/Control = 9 Female/PND2S = 9	Sex × ELS: p=0.9393 Sex: p=0.8876 ELS: p=0.1270	F (1, 32) = 0.005884 F (1, 32) = 0.02029 F (1, 32) = 2.455
S2I	Two-way ANOVA	Male/Control = 9 Male/PND2S = 9 Female/Control = 9 Female/PND2S = 9	Sex × ELS: p=0.7617 Sex: p>0.9999 ELS: p=0.2301	F (1, 32) = 0.09357 F (1, 32) = 0.000 F (1, 32) = 1.497
S4A	Three-way ANOVA	Male/CTL/mCherry/SAL = 13 Male/CTL/mCherry/CNO = 13 Male/CTL/Gi/SAL = 13 Male/CTL/Gi/CNO = 13 Male/CTL/Gq/SAL = 13 Male/CTL/Gq/CNO = 13 Male/PND2S/mCherry/SAL = 14 Male/PND2S/mCherry/CNO = 14 Male/PND2S/Gi/SAL = 16 Male/PND2S/Gi/CNO = 16 Male/PND2S/Gq/SAL = 14 Male/PND2S/Gq/CNO = 14	DDREAD: p=0.5614 ELS: p<0.0001 CNO: p=0.1218 DDREAD x ELS: p=0.4084 DDREAD x CNO: p=0.0838 ELS x CNO: p=0.0473 DDREAD x ELS x CNO: p=0.0892	F (2, 77) = 0.5816 F (1, 77) = 29.79 F (1, 77) = 2.448 F (2, 77) = 0.9061 F (2, 77) = 2.561 F (1, 77) = 4.063 F (2, 77) = 2.494
S4B	Three-way ANOVA	Male/CTL/mCherry/SAL = 13 Male/CTL/mCherry/CNO = 13 Male/CTL/Gi/SAL = 13 Male/CTL/Gi/CNO = 13 Male/CTL/Gq/SAL = 13 Male/CTL/Gq/CNO = 13 Male/PND2S/mCherry/SAL = 14 Male/PND2S/mCherry/CNO = 14 Male/PND2S/Gi/SAL = 16 Male/PND2S/Gi/CNO = 16 Male/PND2S/Gq/SAL = 14 Male/PND2S/Gq/CNO = 14	DDREAD: p=0.1470 ELS: p=0.0029 CNO: p=0.5597 DDREAD x ELS: p=0.7062 DDREAD x CNO: p=0.1075 ELS x CNO: p=0.1251 DDREAD x ELS x CNO: p=0.3915	F (2, 77) = 1.966 F (1, 77) = 9.470 F (1, 77) = 0.3433 F (2, 77) = 0.3494 F (2, 77) = 2.296 F (1, 77) = 2.404 F (2, 77) = 0.9492
S4C	Three-way ANOVA	Male/CTL/mCherry/SAL = 13 Male/CTL/mCherry/CNO = 13 Male/CTL/Gi/SAL = 13 Male/CTL/Gi/CNO = 13 Male/CTL/Gq/SAL = 13 Male/CTL/Gq/CNO = 13 Male/PND2S/mCherry/SAL = 14 Male/PND2S/mCherry/CNO = 14 Male/PND2S/Gi/SAL = 16 Male/PND2S/Gi/CNO = 16 Male/PND2S/Gq/SAL = 14 Male/PND2S/Gq/CNO = 14	DDREAD: p=0.2933 ELS: p<0.0001 CNO: p<0.0001 DDREAD x ELS: p=0.2134 DDREAD x CNO: p=0.0882 ELS x CNO: p=0.1408 DDREAD x ELS x CNO: p=0.0076	F (2, 77) = 1.246 F (1, 77) = 22.45 F (1, 77) = 17.81 F (2, 77) = 1.576 F (2, 77) = 2.507 F (1, 77) = 2.214 F (2, 77) = 5.207
S4D	Three-way ANOVA	Male/CTL/mCherry/SAL = 13 Male/CTL/mCherry/CNO = 13 Male/CTL/Gi/SAL = 13 Male/CTL/Gi/CNO = 13 Male/CTL/Gq/SAL = 13 Male/CTL/Gq/CNO = 13 Male/PND2S/mCherry/SAL = 14 Male/PND2S/mCherry/CNO = 14 Male/PND2S/Gi/SAL = 16 Male/PND2S/Gi/CNO = 16 Male/PND2S/Gq/SAL = 14 Male/PND2S/Gq/CNO = 14	DDREAD: p=0.2029 ELS: p<0.0001 CNO: p=0.5010 DDREAD x ELS: p=0.4259 DDREAD x CNO: p=0.0095 ELS x CNO: p=0.8776 DDREAD x ELS x CNO: p=0.0129	F (2, 77) = 1.629 F (1, 77) = 36.58 F (1, 77) = 0.4571 F (2, 77) = 0.8632 F (2, 77) = 4.946 F (1, 77) = 0.02387 F (2, 77) = 4.605
S4E	Three-way ANOVA	Male/CTL/mCherry/SAL = 13 Male/CTL/mCherry/CNO = 13 Male/CTL/Gi/SAL = 13 Male/CTL/Gi/CNO = 13 Male/CTL/Gq/SAL = 13 Male/CTL/Gq/CNO = 13 Male/PND2S/mCherry/SAL = 14 Male/PND2S/mCherry/CNO = 14 Male/PND2S/Gi/SAL = 16 Male/PND2S/Gi/CNO = 16 Male/PND2S/Gq/SAL = 14 Male/PND2S/Gq/CNO = 14	DDREAD: p=0.6545 ELS: p=0.3164 CNO: p=0.5939 DDREAD x ELS: p=0.5222 DDREAD x CNO: p=0.2383 ELS x CNO: p=0.8508 DDREAD x ELS x CNO: p=0.3683	F (2, 77) = 0.4262 F (1, 77) = 1.017 F (1, 77) = 0.2867 F (2, 77) = 0.6553 F (2, 77) = 1.461 F (1, 77) = 0.03561 F (2, 77) = 1.012
S4F	Two-way ANOVA Post hoc: Šídák's multiple comparisons test	Male/PND2S/mCherry/SAL = 14 Male/PND2S/mCherry/CNO = 14 Male/PND2S/Gi/SAL = 16 Male/PND2S/Gi/CNO = 16 Male/PND2S/Gq/SAL = 14 Male/PND2S/Gq/CNO = 14	DREADD x CNO: p=0.2395 DREADD: p=0.4556 CNO: p=0.7990 Male/PND2S/mCherry/SAL vs. Male/PND2S/mCherry/CNO: p=0.9652 Male/PND2S/Gi/SAL vs. Male/PND2S/Gi/CNO: p=0.3185 Male/PND2S/Gq/SAL vs. Male/PND2S/Gq/CNO: p=0.8991	F (2, 41) = 1.480 F (2, 41) = 0.8014 F (1, 41) = 0.06566
S5A	Three-way ANOVA	Female/CTL/mCherry/SAL = 12 Female/CTL/mCherry/CNO = 12 Female/CTL/Gi/SAL = 13 Female/CTL/Gi/CNO = 13 Female/CTL/Gq/SAL = 14 Female/CTL/Gq/CNO = 14 Female/PND2S/mCherry/SAL = 10 Female/PND2S/mCherry/CNO = 10 Female/PND2S/Gi/SAL = 9 Female/PND2S/Gi/CNO = 9 Female/PND2S/Gq/SAL = 9 Female/PND2S/Gq/CNO = 9	DDREAD: p=0.1943 ELS: p=0.7225 CNO: p=0.8850 DDREAD x ELS: p=0.5733 DDREAD x CNO: p=0.9937 ELS x CNO: p=0.7138 DDREAD x ELS x CNO: p=0.7597	F (2, 61) = 1.683 F (1, 61) = 0.1272 F (1, 61) = 0.02108 F (2, 61) = 0.5614 F (2, 61) = 0.006330 F (1, 61) = 0.1358 F (2, 61) = 0.2761
S5B	Three-way ANOVA	Female/CTL/mCherry/SAL = 12 Female/CTL/mCherry/CNO = 12 Female/CTL/Gi/SAL = 13 Female/CTL/Gi/CNO = 13 Female/CTL/Gq/SAL = 14 Female/CTL/Gq/CNO = 14 Female/PND2S/mCherry/SAL = 10 Female/PND2S/mCherry/CNO = 10 Female/PND2S/Gi/SAL = 9 Female/PND2S/Gi/CNO = 9 Female/PND2S/Gq/SAL = 9 Female/PND2S/Gq/CNO = 9	DDREAD: p=0.1065 ELS: p=0.7448 CNO: p=0.0354 DDREAD x ELS: p=0.3163 DDREAD x CNO: p=0.1570 ELS x CNO: p=0.9882 DDREAD x ELS x CNO: p=0.6337	F (2, 61) = 2.324 F (1, 61) = 0.1069 F (1, 61) = 4.629 F (2, 61) = 1.173 F (2, 61) = 1.909 F (1, 61) = 0.0002196 F (2, 61) = 0.4596
S5C	Three-way ANOVA	Female/CTL/mCherry/SAL = 12 Female/CTL/mCherry/CNO = 12 Female/CTL/Gi/SAL = 13 Female/CTL/Gi/CNO = 13 Female/CTL/Gq/SAL = 14 Female/CTL/Gq/CNO = 14 Female/PND2S/mCherry/SAL = 10 Female/PND2S/mCherry/CNO = 10 Female/PND2S/Gi/SAL = 9 Female/PND2S/Gi/CNO = 9 Female/PND2S/Gq/SAL = 9 Female/PND2S/Gq/CNO = 9	DDREAD: p=0.3407 ELS: p=0.8904 CNO: p=0.0013 DDREAD x ELS: p=0.3995 DDREAD x CNO: p=0.0385 ELS x CNO: p=0.5226 DDREAD x ELS x CNO: p=0.8596	F (2, 61) = 1.096 F (1, 61) = 0.01914 F (1, 61) = 11.37 F (2, 61) = 0.9419 F (2, 61) = 3.438 F (1, 61) = 0.4135 F (2, 61) = 0.1516
S5D	Three-way ANOVA	Female/CTL/mCherry/SAL = 12 Female/CTL/mCherry/CNO = 12 Female/CTL/Gi/SAL = 13 Female/CTL/Gi/CNO = 13 Female/CTL/Gq/SAL = 14 Female/CTL/Gq/CNO = 14 Female/PND2S/mCherry/SAL = 10 Female/PND2S/mCherry/CNO = 10 Female/PND2S/Gi/SAL = 9 Female/PND2S/Gi/CNO = 9 Female/PND2S/Gq/SAL = 9 Female/PND2S/Gq/CNO = 9	DDREAD: p=0.6183 ELS: p=0.6124 CNO: p=0.3834 DDREAD x ELS: p=0.8448 DDREAD x CNO: p=0.8921 ELS x CNO: p=0.4437 DDREAD x ELS x CNO: p=0.9301	F (2, 61) = 0.4846 F (1, 61) = 0.2594 F (1, 61) = 0.7708 F (2, 61) = 0.1691 F (2, 61) = 0.1144 F (1, 61) = 0.5944 F (2, 61) = 0.07255
S5E	Three-way ANOVA	Female/CTL/mCherry/SAL = 12 Female/CTL/mCherry/CNO = 12 Female/CTL/Gi/SAL = 13 Female/CTL/Gi/CNO = 13 Female/CTL/Gq/SAL = 14 Female/CTL/Gq/CNO = 14 Female/PND2S/mCherry/SAL = 10 Female/PND2S/mCherry/CNO = 10 Female/PND2S/Gi/SAL = 9 Female/PND2S/Gi/CNO = 9 Female/PND2S/Gq/SAL = 9 Female/PND2S/Gq/CNO = 9	DDREAD: p=0.0150 ELS: p<0.0001 CNO: p=0.1524 DDREAD x ELS: p=0.8239 DDREAD x CNO: p=0.0381 ELS x CNO: p=0.6731 DDREAD x ELS x CNO: p=0.1741	F (2, 61) = 4.502 F (1, 61) = 26.29 F (1, 61) = 2.100 F (2, 61) = 0.1943 F (2, 61) = 3.448 F (1, 61) = 0.1798 F (2, 61) = 1.799
S6A	Three-way ANOVA	Male/CTL/mCherry/SAL = 10 Male/CTL/mCherry/CNO = 10 Male/CTL/Gq/SAL = 10 Male/CTL/Gq/CNO = 10 Male/PND2S/mCherry/SAL = 11 Male/PND2S/mCherry/CNO = 11 Male/PND2S/Gq/SAL = 11 Male/PND2S/Gq/CNO = 11	CNO: p=0.3892 ELS: p=0.0664 Gq: p=0.2609 CNO x ELS: p=0.3812 CNO x Gq: p=0.1323 ELS x Gq: p=0.9164 CNO x ELS x Gq: p=0.2088	F (1, 38) = 0.7588 F (1, 38) = 3.571 F (1, 38) = 1.302 F (1, 38) = 0.7849 F (1, 38) = 2.366 F (1, 38) = 0.01116 F (1, 38) = 1.635
S6B	Three-way ANOVA	Male/CTL/mCherry/SAL = 10 Male/CTL/mCherry/CNO = 10 Male/CTL/Gq/SAL = 10 Male/CTL/Gq/CNO = 10 Male/PND2S/mCherry/SAL = 11 Male/PND2S/mCherry/CNO = 11 Male/PND2S/Gq/SAL = 11 Male/PND2S/Gq/CNO = 11	CNO: p=0.2814 ELS: p=0.1603 Gq: p=0.7532 CNO x ELS: p=0.8308 CNO x Gq: p=0.5378 ELS x Gq: p=0.5608 CNO x ELS x Gq: p=0.1729	F (1, 38) = 1.194 F (1, 38) = 2.051 F (1, 38) = 0.1003 F (1, 38) = 0.04628 F (1, 38) = 0.3866 F (1, 38) = 0.3444 F (1, 38) = 1.930
S6C	Three-way ANOVA	Male/CTL/mCherry/SAL = 10 Male/CTL/mCherry/CNO = 10 Male/CTL/Gq/SAL = 10 Male/CTL/Gq/CNO = 10 Male/PND2S/mCherry/SAL = 11 Male/PND2S/mCherry/CNO = 11 Male/PND2S/Gq/SAL = 11 Male/PND2S/Gq/CNO = 11	CNO: p=0.8287 ELS: p=0.1723 Gq: p=0.0032 CNO x ELS: p=0.1274 CNO x Gq: p=0.0179 ELS x Gq: p=0.4615 CNO x ELS x Gq: p=0.5573	F (1, 38) = 0.04747 F (1, 38) = 1.935 F (1, 38) = 9.877 F (1, 38) = 2.429 F (1, 38) = 6.124 F (1, 38) = 0.5535 F (1, 38) = 0.3506
S6D	Three-way ANOVA	Male/CTL/mCherry/SAL = 10 Male/CTL/mCherry/CNO = 10 Male/CTL/Gq/SAL = 10 Male/CTL/Gq/CNO = 10 Male/PND2S/mCherry/SAL = 11 Male/PND2S/mCherry/CNO = 11 Male/PND2S/Gq/SAL = 11 Male/PND2S/Gq/CNO = 11	CNO: p=0.1639 ELS: p=0.0010 Gq: p=0.0014 CNO x ELS: p=0.3262 CNO x Gq: p=0.7306 ELS x Gq: p=0.1594 CNO x ELS x Gq: p=0.0457	F (1, 38) = 2.015 F (1, 38) = 12.75 F (1, 38) = 11.96 F (1, 38) = 0.9892 F (1, 38) = 0.1204 F (1, 38) = 2.060 F (1, 38) = 4.266
S7A	Three-way ANOVA	XYM/CTL = 9 XYM/PND2S = 11 XXM/CTL = 10 XXM/PND2S = 15 XYF/CTL = 7 XYF/PND2S = 12 XXF/CTL = 13 XXF/PND2S = 13	Gonadal Sex: p=0.4834 Chromosomal Sex: p=0.1907 ELS: p=0.0057 Gonadal Sex x Chromosomal Sex: p=0.5294 Gonadal Sex x ELS: p=0.6999 Chromosomal Sex x ELS: p=0.0062 Gonadal Sex x Chromosomal Sex x ELS: p=0.2579	F (1, 82) = 0.4957 F (1, 82) = 1.741 F (1, 82) = 8.053 F (1, 82) = 0.3989 F (1, 82) = 0.1496 F (1, 82) = 7.892 F (1, 82) = 1.298
S7B	Two-way ANOVA Post hoc: Šídák's multiple comparisons test	XYM/CTL = 9 XYM/PND2S = 11 XXM/CTL = 10 XXM/PND2S = 15	Chromosomal Sex x ELS: p=0.0126 Chromosomal Sex: p=0.6519 ELS: p=0.1131 XYM/CTL vs. XYM/PND2S: p=0.0134 XYM/PND2S vs. XXM/PND2S: p=0.0476	F (1, 41) = 6.806 F (1, 41) = 0.2066 F (1, 41) = 2.622
S7C	Two-way ANOVA Post hoc: Šídák's multiple comparisons test	XYF/CTL = 7 XYF/PND2S = 12 XXF/CTL = 13 XXF/PND2S = 13	Chromosomal Sex x ELS: p=0.2073 Chromosomal Sex: p=0.1421 ELS: p=0.0176 XYF/CTL vs. XYF/PND2S: p=0.0384 XYF/PND2S vs. XXF/PND2S: p=0.0754	F (1, 41) = 1.641 F (1, 41) = 2.240 F (1, 41) = 6.119
S7D	Two-way ANOVA Post hoc: Šídák's multiple comparisons test	Male/CTL (XY+XX) = 19 Male/PND2S (XY +XX) = 23 Female/CTL (XY+XX) = 20 Female/PND2S (XY+XX) = 25	Gonadal Sex x ELS: p=0.5669 Gonadal Sex: p=0.5456 ELS: p=0.0135 Female/CTL (XY+XX) vs. Female/PND2S (XY+XX): p=0.0606	F (1, 86) = 0.3304 F (1, 86) = 0.3682 F (1, 86) = 6.360
S7E	Three-way ANOVA	XYM/CTL = 9 XYM/PND2S = 11 XXM/CTL = 10 XXM/PND2S = 15 XYF/CTL = 7 XYF/PND2S = 12 XXF/CTL = 13 XXF/PND2S = 13	Gonadal Sex: p=0.0029 Chromosomal Sex: p=0.4873 ELS: p=0.1011 Gonadal Sex x Chromosomal Sex: p=0.6070 Gonadal Sex x ELS: p=0.1263 Chromosomal Sex x ELS: p=0.0135 Gonadal Sex x Chromosomal Sex x ELS: p=0.2186	F (1, 82) = 9.441 F (1, 82) = 0.4868 F (1, 82) = 2.750 F (1, 82) = 0.2666 F (1, 82) = 2.386 F (1, 82) = 6.377 F (1, 82) = 1.537
S7F	Two-way ANOVA Post hoc: Šídák's multiple comparisons test	XYM/CTL = 9 XYM/PND2S = 11 XXM/CTL = 10 XXM/PND2S = 15	Chromosomal Sex x ELS: p=0.0210 Chromosomal Sex: p=0.9085 ELS: p=0.0477 XXM/CTL vs. XXM/PND2S: p=0.0040	F (1, 41) = 5.759 F (1, 41) = 0.01337 F (1, 41) = 4.168
S7G	Two-way ANOVA	XYF/CTL = 7 XYF/PND2S = 12 XXF/CTL = 13 XXF/PND2S = 13	Chromosomal Sex x ELS: p=0.3038 Chromosomal Sex: p=0.3311 ELS: p=0.9271	F (1, 41) = 1.084 F (1, 41) = 0.9674 F (1, 41) = 0.008477
S7H	Two-way ANOVA Post hoc: Šídák's multiple comparisons test	Male/CTL (XY+XX) = 19 Male/PND2S (XY +XX) = 23 Female/CTL (XY+XX) = 20 Female/PND2S (XY+XX) = 25	Gonadal Sex x ELS: p=0.1293 Gonadal Sex: p=0.0068 ELS: p=0.0468 Male/CTL (XY+XX) vs. Male/PND2S (XY+XX): p=0.0283 Male/CTL (XY+XX) vs. Female/CTL (XY+XX): p=0.0106	F (1, 86) = 2.346 F (1, 86) = 7.692 F (1, 86) = 4.068
S7I	Three-way ANOVA	XYM/CTL = 9 XYM/PND2S = 11 XXM/CTL = 10 XXM/PND2S = 15 XYF/CTL = 7 XYF/PND2S = 12 XXF/CTL = 13 XXF/PND2S = 13	Gonadal Sex: p=0.1424 Chromosomal Sex: p=0.0344 ELS: p<0.0001 Gonadal Sex x Chromosomal Sex: p=0.2459 Gonadal Sex x ELS: p=0.4833 Chromosomal Sex x ELS: p=0.1326 Gonadal Sex x Chromosomal Sex x ELS: p=0.6529	F (1, 82) = 2.193 F (1, 82) = 4.627 F (1, 82) = 22.53 F (1, 82) = 1.366 F (1, 82) = 0.4960 F (1, 82) = 2.307 F (1, 82) = 0.2038
S7J	Two-way ANOVA Post hoc: Šídák's multiple comparisons test	XYM/CTL = 9 XYM/PND2S = 11 XXM/CTL = 10 XXM/PND2S = 15	Chromosomal Sex x ELS: p=0.1455 Chromosomal Sex: p=0.4637 ELS: p=0.0002 XYM/CTL vs. XYM/PND2S: p=0.0010	F (1, 41) = 2.202 F (1, 41) = 0.5471 F (1, 41) = 16.85
S7K	Two-way ANOVA Post hoc: Šídák's multiple comparisons test	XYF/CTL = 7 XYF/PND2S = 12 XXF/CTL = 13 XXF/PND2S = 13	Chromosomal Sex x ELS: p=0.4800 Chromosomal Sex: p=0.0323 ELS: p=0.0101 XYF/CTL vs. XYF/PND2S: p=0.0642 XYF/PND2S vs. XXF/PND2S: p=0.0581	F (1, 41) = 0.5082 F (1, 41) = 4.913 F (1, 41) = 7.284
S7L	Two-way ANOVA Post hoc: Šídák's multiple comparisons test	Male/CTL (XY+XX) = 19 Male/PND2S (XY +XX) = 23 Female/CTL (XY+XX) = 20 Female/PND2S (XY+XX) = 25	Gonadal Sex x ELS: p=0.6566 Gonadal Sex: p=0.1809 ELS: p<0.0001 Male/CTL (XY+XX) vs. Male/PND2S (XY+XX): p=0.0010 Female/CTL (XY+XX) vs. Female/PND2S (XY+XX): p=0.0070	F (1, 86) = 0.1990 F (1, 86) = 1.820 F (1, 86) = 21.87
S8A	Three-way ANOVA	XYM/CTL = 9 XYM/PND2S = 11 XXM/CTL = 10 XXM/PND2S = 15 XYF/CTL = 7 XYF/PND2S = 12 XXF/CTL = 13 XXF/PND2S = 13	Gonadal Sex: p=0.7581 Chromosomal Sex: p=0.0023 ELS: p=0.0115 Gonadal Sex x Chromosomal Sex: p=0.7249 Gonadal Sex x ELS: p=0.2295 Chromosomal Sex x ELS: p=0.0033 Gonadal Sex x Chromosomal Sex x ELS: p=0.3598	F (1, 82) = 0.09551 F (1, 82) = 9.889 F (1, 82) = 6.682 F (1, 82) = 0.1247 F (1, 82) = 1.466 F (1, 82) = 9.165 F (1, 82) = 0.8481
S8B	Two-way ANOVA Post hoc: Šídák's multiple comparisons test	XYM/CTL = 9 XYM/PND2S = 11 XXM/CTL = 10 XXM/PND2S = 15	Chromosomal Sex x ELS: p=0.0044 Chromosomal Sex: p=0.0872 ELS: p=0.2394 XYM/CTL vs. XYM/PND2S: p=0.0138 XYM/PND2S vs. XXM/PND2S: p=0.0015	F (1, 41) = 9.086 F (1, 41) = 3.071 F (1, 41) = 1.425
S8C	Two-way ANOVA Post hoc: Šídák's multiple comparisons test	XYF/CTL = 7 XYF/PND2S = 12 XXF/CTL = 13 XXF/PND2S = 13	Chromosomal Sex x ELS: p=0.1368 Chromosomal Sex: p=0.0157 ELS: p=0.0092 XYF/CTL vs. XYF/PND2S: p=0.0173 XYF/PND2S vs. XXF/PND2S: p=0.0068	F (1, 41) = 2.303 F (1, 41) = 6.350 F (1, 41) = 7.478
S8D	Two-way ANOVA Post hoc: Šídák's multiple comparisons test	Male/CTL (XY+XX) = 19 Male/PND2S (XY +XX) = 23 Female/CTL (XY+XX) = 20 Female/PND2S (XY+XX) = 25	Gonadal Sex x ELS: p=0.1626 Gonadal Sex: p=0.8365 ELS: p=0.0330 Female/CTL (XY+XX) vs. Female/PND2S (XY+XX): p=0.0259	F (1, 86) = 1.983 F (1, 86) = 0.04287 F (1, 86) = 4.694
S9A	Three-way ANOVA	XYM/CTL = 9 XYM/PND2S = 10 XXM/CTL = 10 XXM/PND2S = 13 XYF/CTL = 7 XYF/PND2S = 12 XXF/CTL = 13 XXF/PND2S = 13	Gonadal Sex: p=0.0005 Chromosomal Sex: p=0.6345 ELS: p=0.0118 Gonadal Sex x Chromosomal Sex: p=0.4179 Gonadal Sex x ELS: p=0.0204 Chromosomal Sex x ELS: p=0.1623 Gonadal Sex x Chromosomal Sex x ELS: p=0.9833	F (1, 79) = 12.98 F (1, 79) = 0.2278 F (1, 79) = 6.643 F (1, 79) = 0.6630 F (1, 79) = 5.597 F (1, 79) = 1.990 F (1, 79) = 0.0004403
S9B	Two-way ANOVA Post hoc: Šídák's multiple comparisons test	XYM/CTL = 9 XYM/PND2S = 10 XXM/CTL = 10 XXM/PND2S = 13	Chromosomal Sex x ELS: p=0.1644 Chromosomal Sex: p=0.7542 ELS: p=0.6461	F (1, 38) = 2.010 F (1, 38) = 0.09949 F (1, 38) = 0.2143
S9C	Two-way ANOVA Post hoc: Šídák's multiple comparisons test	XYF/CTL = 7 XYF/PND2S = 12 XXF/CTL = 13 XXF/PND2S = 13	Chromosomal Sex x ELS: p=0.4364 Chromosomal Sex: p=0.4692 ELS: p=0.0078 XYF/CTL vs. XYF/PND2S: p=0.0500	F (1, 41) = 0.6178 F (1, 41) = 0.5336 F (1, 41) = 7.817
S9D	Two-way ANOVA Post hoc: Šídák's multiple comparisons test	XY/CTL (M+F) = 16 XY/PND2S (M+F) = 22 XX/CTL (M+F) = 23 XX/PND2S (M+F) = 26	ELS x Chromosomal sex: p=0.1366 Chromosomal sex: p=0.6140 ELS: p=0.0127 XY/CTL (M+F) vs. XY/PND2S (M+F): p=0.0174	F (1, 83) = 2.259 F (1, 83) = 0.2563 F (1, 83) = 6.487
